# Supplementary material for: Influence of acidity on liquid–liquid phase transitions of mixed secondary organic aerosol (SOA) proxy–inorganic aerosol droplets
Source: Copernicus journal article supplement (doi:10.5194/acp-23-10255-2023), 2023-09-14
Supplement: Supplementary file 1 [file acp-23-10255-2023-supplement.pdf]

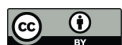

*Supplement of*

## **Influence of acidity on liquid–liquid phase transitions of mixed secondary organic aerosol (SOA) proxy–inorganic aerosol droplets**

**Yueling Chen et al.**

*Correspondence to:* Zhibin Wang ([wangzhibin@zju.edu.cn](mailto:wangzhibin@zju.edu.cn))

The copyright of individual parts of the supplement might differ from the article licence.

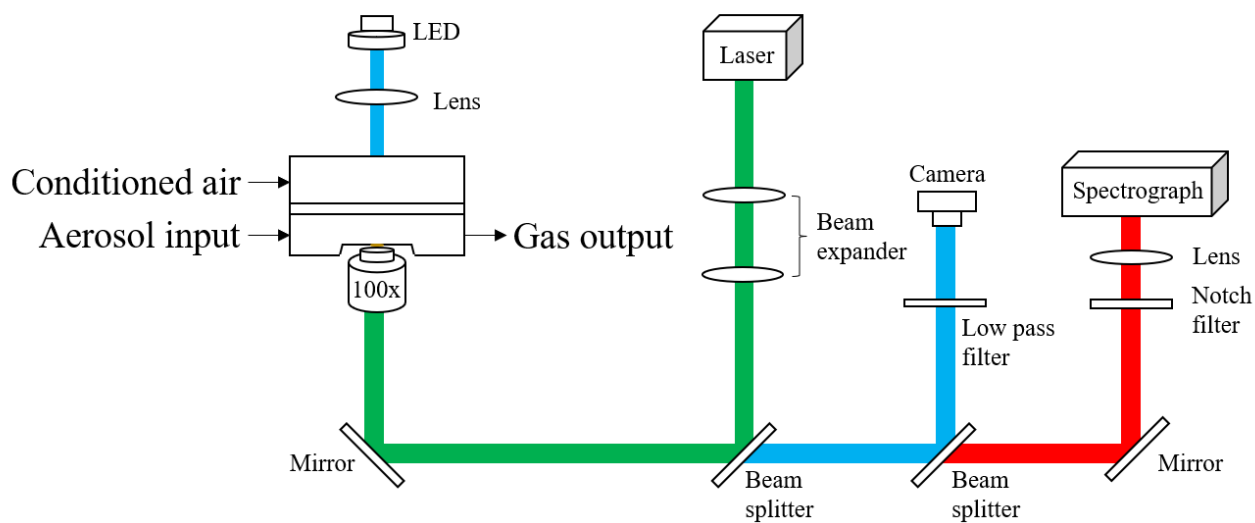

1

2 **Figure S1.** Schematic of aerosol optical tweezer setup used in this study. Medical nebulizer nebulized dissolved solution to  
 3 generate aerosol droplets. Conditioned airflow is mixed by a dry airflow and a humid airflow that humidified by a water  
 4 bubbler. A temperature and humidity sensor measured the temperature and RH of the conditioned airflow after it enters the  
 5 chamber.

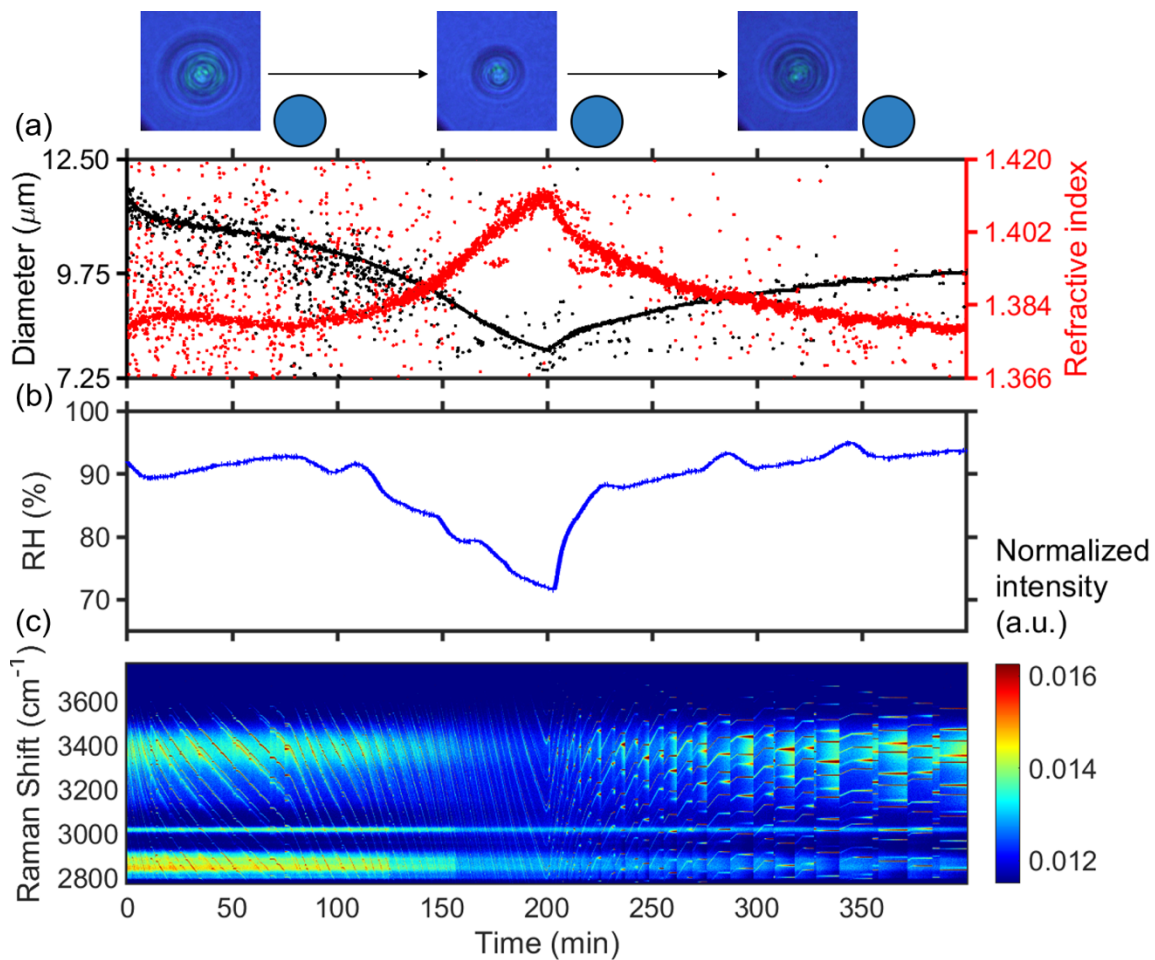

6

7 **Figure S2.** Result of GL/AS system. (a) Timescale of changes in droplet size and refractive index, determined from fitting the  
 8 Raman shift positions of the WGMs. (b) RH variation after the trapping chamber during the humidity changing process with  
 9 time. (c) Time-resolved Raman spectra.

10

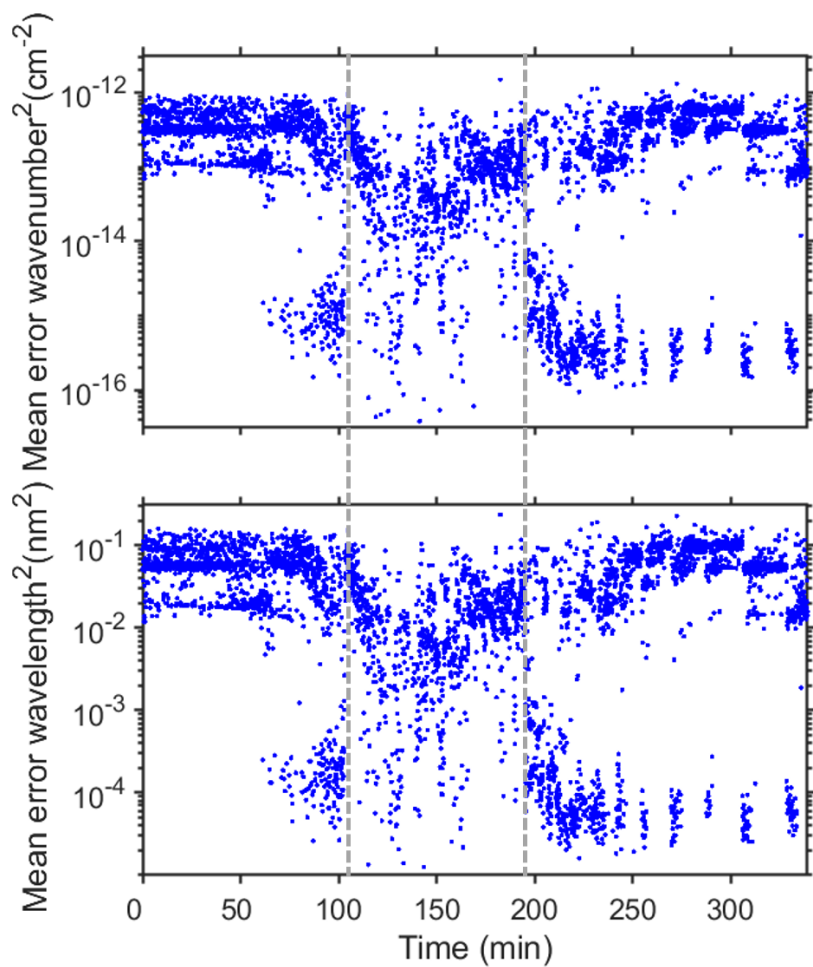

11

12 **Figure S3.** Fitting errors of the WGMs based on the homogenous Mie scattering model, corresponding to Figure 2 in the main  
13 text. The grey dashed lines indicated the moments of LLPS and phase mixing, respectively. The messy points in the figure  
14 primarily resulted from the errors generated during the batch peak finding process using the ipeak algorithm.

15

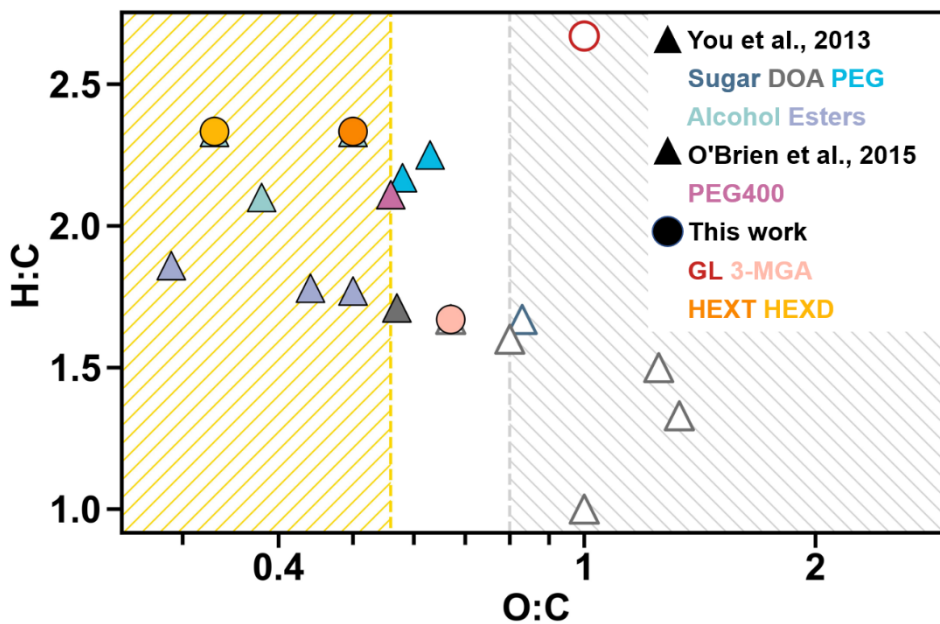

16

17 **Figure S4.** Van Krevelen Diagram for the mixed organic/AS particles: Solid symbols indicate that LLPS was observed,  
 18 while hollow symbols indicate that LLPS was not observed. Solid triangles represent dicarboxylic acids (DOA, including  
 19 malonic acid, malic acid, maleic acid, glutaric acid and diethylmalonic acid), sugars (levoglucosan), esters (including diethyl  
 20 sebacate, suberic acid monomethyl ester and poly diacrylate), alcohols (including 2,5-hexanediol, propylene glycol and  
 21 1,2,6-hexanetriol), PEG (including PEG200 and PEG300) obtained from You et al. (2013), and AS-PEG400 obtained from  
 22 O'Brien et al. (2015).

23

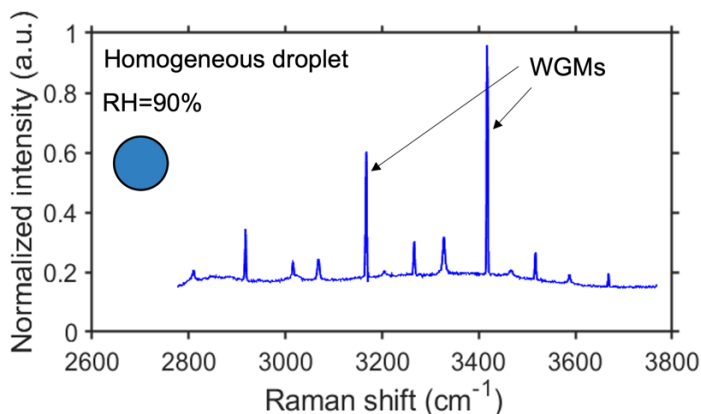

24

25 **Figure S5.** Raman spectra of GL microdroplets. The WGMs are marked by black arrows. The normalization of the peak is  
 26 achieved by dividing it by the maximum value of the spectrum's intensity.

27

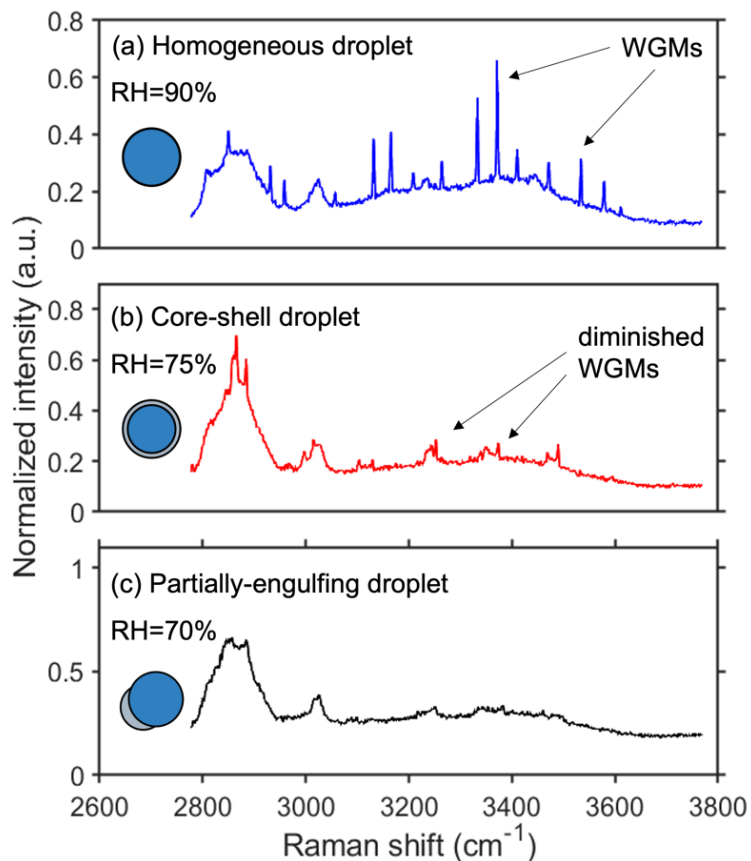

28

29 **Figure S6.** Raman spectra of HEXT-II microdroplets. The WGMs are marked by black arrows. The normalization of the peak  
 30 is achieved by dividing it by the maximum value of its peak intensity. The origins of the spontaneous Raman peaks at 2850  
 31 and  $\sim 3050 \text{ cm}^{-1}$  are vibration of C-H and N-H.

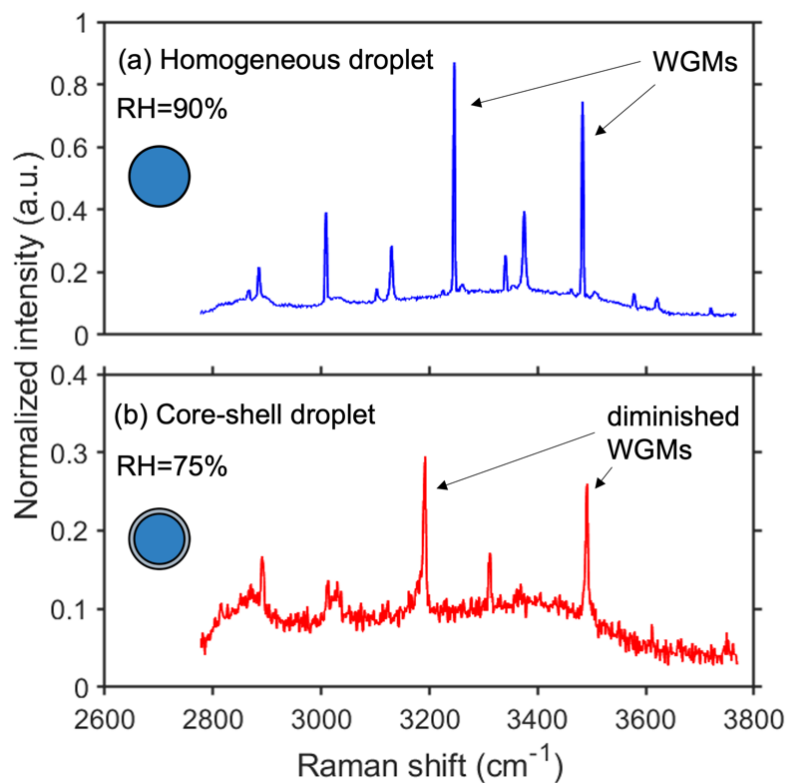

32  
 33 **Figure S7.** Raman spectra of HEXD-V microdroplets. The WGMs are marked by black arrows. The normalization of the peak  
 34 is achieved by dividing it by the maximum value of its peak intensity. The origins of the spontaneous Raman peaks at 2850  
 35 and ~3050 cm<sup>-1</sup> are vibration of C-H and N-H.

36

37

**Table S1.** Purity and suppliers of the compounds used in this study.

| Compounds | Purity                    | Supplier                   |
|-----------|---------------------------|----------------------------|
| GL        | 99.5%                     | Meryer                     |
| 3-MGA     | 99.0%                     | Macklin                    |
| HEXT      | 99.0%                     | TCI                        |
| HEXD      | 99.0%                     | Heowns Biochem LLC         |
| AS        | analytical reagent, >99%  | Sinopharm chemical reagent |
| SA        | analytical reagent, >99%  | Sinopharm chemical reagent |
| NaOH      | analytical reagent, 98.0% | Sinopharm chemical reagent |

38

39

40

41 **Table S2.** Detailed SRH information of 3-MGA/AS system studied, as well as initial diameter, separation diameter (SD),  
 42 separation refractive index (SRI), MRH, mixing diameter (MD), and mixing refractive index (MRI) data. Meanwhile, the  
 43 last column presents the morphology of droplets when the LLPS occurred, core shell structure (CS) or partially-engulfed  
 44 structure (PE).

| Initial pH | Initial Dp ( $\mu\text{m}$ ) | SRH (%) | SD ( $\mu\text{m}$ ) | SRI ( $\lambda=650\text{ nm}$ ) | MRH (%) | MD ( $\mu\text{m}$ ) | MRI ( $\lambda=650\text{ nm}$ ) | Morphology |
|------------|------------------------------|---------|----------------------|---------------------------------|---------|----------------------|---------------------------------|------------|
| 0.48       | 9.86                         | 69.5    | 6.02                 | 1.576                           | 83.5    | 6.82                 | 1.540                           | CS         |
|            | 12.08                        | 69.8    | 8.45                 | 1.454                           |         |                      |                                 | PE         |
| 1.19       | 9.85                         | 75.9    | 6.05                 | 1.570                           | 76.3    | 6.04                 | 1.571                           | CS         |
|            | 11.85                        | 80.7    | 10.66                | 1.398                           | 90.5    | 10.61                | 1.399                           | CS         |
|            | 11.99                        | 76.4    | 9.32                 | 1.394                           | 91.4    | 9.30                 | 1.399                           | CS         |
| 2.7        | 8.99                         | 75.6    | 6.62                 | 1.559                           | 84.5    | 6.71                 | 1.566                           | CS         |
|            | 12.21                        | 82.6    | 9.03                 | 1.401                           | 90      | 9.01                 | 1.400                           | CS         |
|            | 14.86                        | 78.6    | 8.00                 | 1.518                           | 91.6    | 12.21                | 1.559                           | PE         |
| 3.7        | 10.28                        | 84.7    | 7.04                 | 1.518                           |         |                      |                                 | CS         |
|            | 9.37                         | 76.3    | 6.34                 | 1.563                           |         |                      |                                 | CS         |
|            | 12.97                        | 84.6    | 8.32                 | 1.394                           |         |                      |                                 | PE         |
| 5.21       | 12.92                        | 89.2    | 9.02                 | 1.364                           | 89.5    | 7.89                 | 1.381                           | CS         |
|            | 10.37                        | 89.8    | 8.74                 | 1.374                           |         |                      |                                 | CS         |
|            | 9.89                         | 88.1    | 9.02                 | 1.347                           |         |                      |                                 | CS         |
| 6.53       | 13.79                        | 92.7    | 10.10                | 1.262                           | 87.6    | 7.85                 | 1.387                           | CS         |
|            | 13.29                        | 90.8    | 9.77                 | 1.518                           | 91.4    | 7.93                 | 1.379                           | CS         |
|            | 14.10                        | 90.4    | 9.38                 | 1.626                           |         |                      |                                 | CS         |

45

46



47 **Table S3.** Detailed SRH information of HEXT/AS system studied, as well as initial diameter, separation diameter (SD),  
 48 separation refractive index (SRI), MRH, mixing diameter (MD), and mixing refractive index (MRI) data. Meanwhile, the  
 49 last column presents the morphology of droplets when the LLPS occurred.

| Initial pH | Initial Dp (μm) | SRH (%) | SD (μm) | SRI (λ=650 nm) | MRH (%) | MD (μm) | MRI (λ=650 nm) | Morphology |      |       |    |
|------------|-----------------|---------|---------|----------------|---------|---------|----------------|------------|------|-------|----|
| 0.92       | 14.04           | 75.7    | 10.58   | 1.438          | 85.7    | 10.83   | 1.420          | CS         |      |       |    |
|            | 14.75           | 76.0    | 10.04   | 1.420          |         |         |                | PE         |      |       |    |
|            | 11.76           | 76.1    | 9.08    | 1.404          |         |         |                | CS         |      |       |    |
| 2.02       | 11.77           | 76.9    | 9.04    | 1.412          |         |         |                | CS         |      |       |    |
|            | 13.70           | 75.7    | 8.46    | 1.398          |         |         |                | CS         |      |       |    |
|            | 13.78           | 73.8    | 9.45    | 1.413          |         |         |                | CS         |      |       |    |
|            | 12.27           | 79.2    | 9.41    | 1.412          |         |         |                | 81.8       | 9.34 | 1.410 | CS |
| 3.14       | 11.14           | 77.3    | 8.44    | 1.407          |         |         |                | CS         |      |       |    |
|            | 13.10           | 78.1    | 9.38    | 1.410          |         |         |                | CS         |      |       |    |
|            | 12.39           | 74.7    | 9.05    | 1.408          |         |         |                | 81.3       | 9.04 | 1.409 | CS |
|            | 12.60           | 76.2    | 9.18    | 1.408          |         |         |                | CS         |      |       |    |
| 5.11       | 13.96           | 76.8    | 8.90    | 1.394          | 81.9    | 8.52    | 1.412          | CS         |      |       |    |
|            | 13.48           | 82.2    | 9.00    | 1.383          |         |         |                | CS         |      |       |    |
|            | 13.14           | 75.9    | 9.55    | 1.411          |         |         |                | 85.9       | 9.56 | 1.412 | CS |

50  
 51 **Table S4.** Detailed SRH information of HEXD/AS system studied, as well as initial diameter, separation diameter (SD),  
 52 separation refractive index (SRI), MRH, mixing diameter (MD), and mixing refractive index (MRI) data. Meanwhile, the  
 53 last column presents the morphology of droplets when the LLPS occurred.

| Initial pH | Initial Dp (μm) | SRH (%) | SD (μm) | SRI (λ=650 nm) | MRH (%) | MD (μm) | MRI (λ=650 nm) | Morphology |      |       |    |
|------------|-----------------|---------|---------|----------------|---------|---------|----------------|------------|------|-------|----|
| 1.39       | 11.28           | 82.4    | 8.64    | 1.375          |         |         |                | CS         |      |       |    |
|            | 12.35           | 68.0    | 7.96    | 1.414          |         |         |                | CS         |      |       |    |
|            | 10.82           | 69.9    | 7.83    | 1.408          |         |         |                | 81.2       | 7.93 | 1.406 | CS |
| 2.03       | 10.18           | 80.1    | 8.05    | 1.390          |         |         |                | CS         |      |       |    |
|            | 10.24           | 84.0    | 8.81    | 1.376          |         |         |                | CS         |      |       |    |
|            | 11.19           | 84.2    | 6.85    | 1.380          |         |         |                | 87.3       | 8.83 | 1.392 | CS |
| 2.71       | 13.20           | 78.8    | 8.24    | 1.391          | 89.1    | 8.44    | 1.389          | CS         |      |       |    |
|            | 14.54           | 78.9    | 8.61    | 1.382          |         |         |                | 91.8       | 8.89 | 1.377 | CS |
|            | 15.91           | 75.3    | 8.06    | 1.400          |         |         |                | 88.0       | 8.27 | 1.397 | CS |
| 3.13       | 10.79           | 81.5    | 8.77    | 1.376          |         |         |                | CS         |      |       |    |
|            | 11.72           | 80.2    | 9.21    | 1.403          |         |         |                | 89.3       | 9.14 | 1.384 | CS |
|            | 10.54           | 81.4    | 8.92    | 1.373          |         |         |                | CS         |      |       |    |
| 5.01       | 10.20           | 81.4    | 8.77    | 1.362          |         |         |                | CS         |      |       |    |
|            | 10.55           | 75.5    | 8.01    | 1.393          |         |         |                | 89.7       | 8.00 | 1.393 | CS |
|            | 15.09           | 81.2    | 8.20    | 1.397          |         |         |                | 89.5       | 8.76 | 1.387 | CS |

54

**Table S5.** Vapor pressure of organic compounds used in this study

| Compounds | Vapor pressure (mmHg)                          | Reference               |
|-----------|------------------------------------------------|-------------------------|
| GL        | $1.66 \times 10^{-4}$ to $6.68 \times 10^{-3}$ | DTXSID9020663, EPA      |
|           | $7.41 \times 10^{-7}$ to $2.92 \times 10^{-4}$ | DTXSID50211649, EPA     |
| 3-MGA     | $(6.9 \pm 5.2) \times 10^{-6}$                 | Booth et al. (2010)     |
|           | $(5.5 \pm 2.0) \times 10^{-6}$                 | Mønster et al. (2004)   |
| HEXT      | $2.12 \times 10^{-4}$ to $1.82 \times 10^{-4}$ | DTXSID0041224, EPA      |
|           | $(1.5 \pm 0.15) \times 10^{-6}$                | Cotterell et al. (2010) |
|           | $(8.7 \pm 0.19) \times 10^{-7}$                | Cai et al. (2015)       |
| HEXD      | $1.51 \times 10^{-2}$ to $5.27 \times 10^{-2}$ | DTXSID50871000, EPA     |

EPA means United States Environmental Protection, <https://comptox.epa.gov/> (last access: 20 April 2023).

## 57 References

- 58 Booth, A. M., Barley, M. H., Topping, D. O., McFiggans, G., Garforth, A., and Percival, C. J.: Solid state and sub-cooled  
 59 liquid vapour pressures of substituted dicarboxylic acids using Knudsen Effusion Mass Spectrometry (KEMS) and  
 60 Differential Scanning Calorimetry, *Atmos. Chem. Phys.*, 10, 4879–4892, <https://doi.org/10.5194/acp-10-4879-2010>,  
 61 2010.
- 62 Cai, C., Stewart, D. J., Reid, J. P., Zhang, Y.H., Ohm, P., Dutcher, C. S., and Clegg, S. L.: Organic Component Vapor Pressures  
 63 and Hygroscopicities of Aqueous Aerosol Measured by Optical Tweezers, *J.Phys. Chem. A*, 119, 704-718,  
 64 <https://doi.org/10.1021/jp510525r>, 2015.
- 65 Cotterell, M. I., Mason, B. J., Carruthers, A. E., Walker, J. S., Orr-Ewing, A. J., and Reid, J. P.: Measurements of the  
 66 evaporation and hygroscopic response of single fine-mode aerosol particles using a Bessel beam optical trap, *Phys. Chem.*  
 67 *Chem. Phys.*, 16, 2118-2128, <https://doi.org/10.1039/C3CP54368D>, 2014.
- 68 Mønster, J., Rosenørn, T., Svenningsson, B., and Bilde, M.: Evaporation of methyl- and dimethyl-substituted malonic, succinic,  
 69 glutaric and adipic acid particles at ambient temperatures, *Journal of Aerosol Science*, 35, 1453-1465,  
 70 <https://doi.org/10.1016/j.jaerosci.2004.07.004>, 2004.
